# Supplementary material
Source: MDPI journal article supplement (https://www.mdpi.com/2073-4395/13/10/2462)
Supplement: s1 [file s1]

Table S1. Collection data of 81 accessions of wild barley (*H. vulgare* subsp. *spontaneum*) collected in Jordan, Lebanon, and Lybia.

| ICARDA |      |         |        | OTHERNUMB<br>(IHAR project No.) | COL_NO   | COL CODE | SITE NO | COL_DATE   | LON     | LAT    | ALT  | PROVINCE | SITE                                                         |
|--------|------|---------|--------|---------------------------------|----------|----------|---------|------------|---------|--------|------|----------|--------------------------------------------------------------|
| IG     | CROP | CROP NO | ORI ID |                                 |          |          |         |            |         |        |      |          |                                                              |
| 38616  | ICWB | 180007  | JOR    | 1075                            | SY 27041 | JOR81-2  | 7561    | 18.05.1981 | E 35 55 | N32 27 | 500  | Irbid    | 27km before Jarash came from Ramtha                          |
| 38617  | ICWB | 180008  | JOR    | 1076                            | SY 27042 | JOR81-2  | 7564    | 20.05.1981 | E 36 17 | N32 15 | 700  | Mafrq    | Road Zarqa-Mafrq; 22 km before junction Mafrq-Jarash         |
| 38618  | ICWB | 180009  | JOR    | 1077                            | SY 27043 | JOR81-2  | 7565    | 20.05.1981 | E36 15  | N32 17 | 700  | Mafrq    | Road Zarqa-Mafrq; 3km before junction Mafrq-Jarash           |
| 38619  | ICWB | 180010  | JOR    | 1078                            | SY 27044 | JOR81-2  | 7566    | 20.05.1981 | E 36 10 | N32 18 | 700  | Mafrq    | 13 km after Mafrq (before Rihab) on the Mafrq-Jarash road    |
| 38620  | ICWB | 180011  | JOR    | 1079                            | SY 27045 | JOR81-2  | 7568    | 21.05.1981 | E 35 52 | N32 07 | 700  | Balqa    | 26km S Jarash                                                |
| 38621  | ICWB | 180012  | JOR    | 1080                            | SY 27046 | JOR81-2  | 7569    | 21.05.1981 | E 35 52 | N32 10 | 500  | Irbid    | 19km S Jarash                                                |
| 38622  | ICWB | 180013  | JOR    | 1081                            | SY 27047 | JOR81-2  | 7570    | 21.05.1981 | E 35 52 | N32 14 | 480  | Irbid    | 3km Sjarash on the road to Amman                             |
| 38623  | ICWB | 180014  | JOR    | 1082                            | SY 27048 | JOR81-2  | 7571    | 21.05.1981 | E35 55  | N32 20 | 1060 | Irbid    | 11 km N Jarash on road to Irbid; top of hill                 |
| 38624  | ICWB | 180015  | JOR    | 1083                            | SY 27049 | JOR81-2  | 7572    | 21.05.1981 | E35 57  | N32 23 | 900  | Irbid    | 11 km S Jarash on the road to Amman                          |
| 38625  | ICWB | 180016  | JOR    | 1084                            | SY 27050 | JOR81-2  | 7575    | 21.05.1981 | E 36 00 | N32 35 | 600  | Irbid    | 3 km NW Ramtha                                               |
| 38626  | ICWB | 180017  | JOR    | 1085                            | SY 27051 | JOR81-2  | 7577    | 22.05.1981 | E 35 45 | N32 41 | 500  | Irbid    | Kufr Sum; 3 km S of Samar                                    |
| 38627  | ICWB | 180018  | JOR    | 1086                            | SY 27053 | JOR81-2  | 7580    | 22.05.1981 | E 35 37 | N32 40 | -70  | Irbid    | Jordan Valley; 1.6 km S of left turn to Adesia (hot springs) |
| 38628  | ICWB | 180019  | JOR    | 1087                            | SY 27054 | JOR81-2  | 7581    | 23.05.1981 | E 35 42 | N32 35 | 300  | Irbid    | Irbid-Esh Shuna road; 16 km W junction Irbid-Deir Abu Said   |
| 38629  | ICWB | 180020  | JOR    | 1088                            | SY 27056 | JOR81-2  | 7584    | 23.05.1981 | E 35 45 | N32 26 | 500  | Irbid    | 8 km S of Deir Abu Said at Kufr Awan                         |
| 38630  | ICWB | 180021  | JOR    | 1089                            | SY 27057 | JOR81-2  | 7586    | 23.05.1981 | E 35 42 | N32 22 | 600  | Irbid    | 11 km S of Kufr Awn                                          |
| 38631  | ICWB | 180022  | JOR    | 1090                            | SY 27058 | JOR81-2  | 7588    | 23.05.1981 | E35 49  | N32 20 | 1100 | Irbid    | 24 km S of Kufr Awn                                          |
| 38632  | ICWB | 180023  | JOR    | 1091                            | SY 27059 | JOR81-2  | 7594    | 25.05.1981 | E35 47  | N32 03 | 1000 | Balqa    | As Sarrouk; road Suweileh-Salt 8 km after junction           |
| 38633  | ICWB | 180024  | JOR    | 1092                            | SY 27066 | JOR81-2  | 7606    | 26.05.1981 | E35 45  | N31 32 | 800  | Amman    | 29 km S Madaba; the southern slope of Wadi Wala valley       |
| 39398  | ICWB | 180789  | JOR    | 1093                            | No.34    | -        | -       | -          | -       | -      | -    | Tafila   | King's Highway, 25 km south from mosque in Tafila; woodland  |
| 39821  | ICWB | 181212  | JOR    | 1094                            | J-2-2    | JOR85    | 2       | 18.05.1985 | E35 57  | N31 42 | 710  | Amman    | Madaba; Jiza 44 km S of Amman                                |
| 39822  | ICWB | 181213  | JOR    | 1095                            | J-5-4    | JOR85    | 5       | 19.05.1985 | E35 30  | N30 30 | 1450 | Ma'an    | Shoubak; 10 km N Petra                                       |
| 39823  | ICWB | 181214  | JOR    | 1096                            | J-7-3    | JOR85    | 7       | 19.05.1985 | E35 40  | N30 47 | 1300 | Tafila   | Rashadiae 26 km N Shoubak towards Tafila                     |
| 39824  | ICWB | 181215  | JOR    | 1097                            | J-10-6   | JOR85    | 10      | 20.05.1985 | E35 54  | N32 29 | 690  | Irbid    | Assarieh; Wadi Al. Gazira; 5 km E of Irbid-Amman highway     |

|       |      |        |     |      |      |       |    |            |        |        |     |       |                                                        |
|-------|------|--------|-----|------|------|-------|----|------------|--------|--------|-----|-------|--------------------------------------------------------|
| 39825 | ICWB | 181216 | JOR | 1098 | J-12 | JOR85 | 12 | 21.05.1985 | E36 04 | N32 32 | 500 | Irbid | Ramtha; perminout site of Y. university; 20 km E Irbid |
|-------|------|--------|-----|------|------|-------|----|------------|--------|--------|-----|-------|--------------------------------------------------------|

Table S1. Continued

| ICARDA |      |         |        | OTHERNUMB<br>(IHAR project<br>No.) | COL_NO       | COL<br>CODE | SITE NO | COL_DATE   | LON    | LAT    | ALT  | PROVINCE  | SITE                                                      |
|--------|------|---------|--------|------------------------------------|--------------|-------------|---------|------------|--------|--------|------|-----------|-----------------------------------------------------------|
| IG     | CROP | CROP NO | ORI ID |                                    |              |             |         |            |        |        |      |           |                                                           |
| 39826  | ICWB | 181217  | JOR    | 1099                               | J-15-1       | JOR85       | 15      | 21.05.1985 | E36 12 | N32 21 | 710  | Mafraq    | Mafraq 45 km E Irbid                                      |
| 39827  | ICWB | 181218  | JOR    | 1100                               | J-16         | JOR85       | 16      | 21.05.1985 | E36 05 | N32 20 | 850  | Mafraq    | Rahab; 3 km E Rahab; 10 km W Mafraq                       |
| 39828  | ICWB | 181219  | JOR    | 1101                               | J-18-2       | JOR85       | 18      | 22.05.1985 | E35 54 | N31 47 | 800  | Amman     | Um el Amad; Madaba                                        |
| 39829  | ICWB | 181220  | JOR    | 1102                               | J-19         | JOR85       | 19      | 22.05.1985 | E35 44 | N32 06 | 900  | Balqa     | Um Jauza; 11 km N Salt                                    |
| 39850  | ICWB | 181241  | JOR    | 1103                               | MSAJ 88026b  | JOR88-1     | 16      | 24.05.1988 | E36 01 | N32 19 | 750  | Mafraq    | Hamama; on road Mafraq-Jarash                             |
| 39851  | ICWB | 181242  | JOR    | 1104                               | MSAJ 88032b  | JOR88-1     | 21      | 25.05.1988 | E35 42 | N32 38 | 340  | Irbid     | Between El Mansoura and Kufr Asad                         |
| 39877  | ICWB | 181268  | JOR    | 1105                               | AE 1         | -           | -       | 09.05.1989 | E35 55 | N32 18 | 750  | Irbid     | Jarash                                                    |
| 39933  | ICWB | 181324  | LBY    | 1107                               | MSAZ 90028   | LBY90       | 1       | 26.05.1990 | E20 54 | N32 33 | 320  | Al Marj   | Al. Marj station                                          |
| 39934  | ICWB | 181325  | LBY    | 1108                               | MSAZ 90031   | LBY90       | 4       | 26.05.1990 | E21 08 | N32 42 | 370  | Al Marj   | Sidi Ismel                                                |
| 39935  | ICWB | 181326  | LBY    | 1109                               | MSAZ 90038   | LBY90       | 7       | 26.05.1990 | E21 38 | N32 47 | 580  | Al Bayda  | 2 km E Massah to El Beyda                                 |
| 39936  | ICWB | 181327  | LBY    | 1110                               | MSAZ 90040   | LBY90       | 8       | 26.05.1990 | E21 52 | N32 05 | 580  | Al Bayda  | 20 km E El Beyda                                          |
| 39937  | ICWB | 181328  | LBY    | 1111                               | MSAZ 90041   | LBY90       | 9       | 27.05.1990 | E22 03 | N32 48 | 580  | Al Qubbah | Saf Saf; just E El Bayda                                  |
| 39938  | ICWB | 181329  | LBY    | 1112                               | MSAZ 90052   | LBY90       | 14      | 27.05.1990 | E22 50 | N32 36 | 180  | Darnah    | Omer Zin; 23 km E Derna                                   |
| 39939  | ICWB | 181330  | LBY    | 1113                               | MSAZ 90054   | LBY90       | 16      | 28.05.1990 | E21 55 | N32 42 | 640  | Shahhat   | Arigha; 2 km S El Beyda                                   |
| 40156  | ICWB | 181547  | LBN    | 1114                               | MSNSSH-92089 | LBN92-2     | 4       | 28.07.1992 | E35 19 | N33 27 | 170  | Zahle     | 15 km S Saida to Nabatiye; near Saksaniye                 |
| 40168  | ICWB | 181559  | LBN    | 1115                               | -            | -           | -       | 12.09.1992 | E35 55 | N33 50 | 1000 | Zahle     |                                                           |
| 40177  | ICWB | 181568  | LBN    | 1116                               | MSJVSK-93048 | LBN93       | 1       | 21.06.1993 | E35 52 | N33 28 | 1150 | Biqaa El  | Biader El-Adas; below Sultan Ya'akoub village on the hill |
| 40178  | ICWB | 181569  | LBN    | 1117                               | MSJVSK-93049 | LBN93       | 2       | 21.06.1993 | E35 49 | N33 37 | 1025 | Biqaa El  | Jeb-Janine; Izzi to Kend El-loz; 1 km W Izzi              |
| 40179  | ICWB | 181570  | LBN    | 1118                               | MSJVSK-93057 | LBN93       | 3       | 21.06.1993 | E35 46 | N33 37 | 1045 | Biqaa El  | 2 km S Jeb-Janine; road to Lala                           |
| 40180  | ICWB | 181571  | LBN    | 1119                               | MSJVSK-93061 | LBN93       | 4       | 21.06.1993 | E35 43 | N33 31 | 980  | Biqaa El  | Rashaya; 2 km from Sohmbri; E of Kafar Mechki             |
| 40181  | ICWB | 181572  | LBN    | 1120                               | MSJVSK-93069 | LBN93       | 5       | 21.06.1993 | E35 46 | N33 31 | 1050 | Biqaa El  | Rashaya; 1 km before Kantaba; on the road from Sahmor     |
| 40182  | ICWB | 181573  | LBN    | 1121                               | MSJVSK-93070 | LBN93       | 6       | 21.06.1996 | E35 49 | N33 27 | 1020 | Biqaa El  | Rashaya; 1 km before Ain Hircha; the road from Rashaya    |
| 40183  | ICWB | 181574  | LBN    | 1122                               | MSJVSK-93075 | LBN93       | 7       | 21.06.1993 | E35 45 | N33 26 | 1250 | Biqaa El  | Rashaya; 2 km from Ain Ata; on the road to Tefair         |

|              |      |        |     |      |              |       |    |            |        |        |      |          |                                                            |
|--------------|------|--------|-----|------|--------------|-------|----|------------|--------|--------|------|----------|------------------------------------------------------------|
| <b>40184</b> | ICWB | 181575 | LBN | 1124 | MSJVSK-93082 | LBN93 | 9  | 22.06.1993 | E36 06 | N33 56 | 1050 | Biqaa El | Ba'labakk; 1 km before Talia; on the road from Zahle       |
| <b>40185</b> | ICWB | 181576 | LBN | 1125 | MSJVSK-93091 | LBN93 | 10 | 22.06.1993 | E36 10 | N34 02 | 1050 | Biqaa El | Ba'labakk; 4 km W Ba'labakk; road to Bcharre; laat village |

Table S1. Continued

| IG           | ICARDA |         |        | OTHERNUMB<br>(IHAR project No.) | COL_NO       |       | SITE NO | COL_DATE   | LON    | LAT    | ALT  | PROVINCE | SITE                                                       |
|--------------|--------|---------|--------|---------------------------------|--------------|-------|---------|------------|--------|--------|------|----------|------------------------------------------------------------|
|              | CROP   | CROP NO | ORI ID |                                 | COL CODE     |       |         |            |        |        |      |          |                                                            |
| <b>40186</b> | ICWB   | 181577  | LBN    | 1126                            | MSJVSK-93100 | LBN93 | 13      | 22.06.1993 | E36 05 | N34 12 | 1810 | Biqaa El | Ba'lbakk; 3 km from Ain Ata; rad to Bcharre                |
| <b>40187</b> | ICWB   | 181578  | LBN    | 1127                            | MSJVSK-93104 | LBN93 | 14      | 22.06.1993 | E36 02 | N34 08 | 1470 | Biqaa El | Ba'lbakk; 2 km Yamouni coming from Ain Ata                 |
| <b>40188</b> | ICWB   | 181579  | LBN    | 1128                            | MSJVSK-93109 | LBN93 | 16      | 23.06.1993 | E36 05 | N34 01 | 1080 | Biqaa El | 500 m before the end of village Sa'ide; rad to Zahle       |
| <b>40189</b> | ICWB   | 181580  | LBN    | 1129                            | MSJVSK-93112 | LBN93 | 17      | 23.06.1993 | E35 49 | N33 30 | 1100 | Biqaa El | Rashaya; Dahr Al. Ahmar; 2 km NW Rashaya                   |
| <b>40190</b> | ICWB   | 181581  | LBN    | 1130                            | MSJVSK-93120 | LBN93 | 18      | 23.06.1993 | E35 53 | N33 31 | 1200 | Biqaa El | Rashaya; Aiha; 3 km N road to Kfar Qoug                    |
| <b>40191</b> | ICWB   | 181582  | LBN    | 1131                            | MSJVSK-93126 | LBN93 | 19      | 23.06.1993 | E35 54 | N33 34 | 1470 | Biqaa El | Rashaya; 6 km from Kfar Qoug towards Bakaa                 |
| <b>40193</b> | ICWB   | 181584  | LBN    | 1132                            | MSJVSK-93135 | LBN93 | 22      | 23.06.1993 | E35 54 | N33 38 | 1350 | Biqaa El | Rashaya; 1 km E of Aita Al Foukhar                         |
| <b>40181</b> | ICWB   | 181572  | LBN    | 1120                            | MSJVSK-93069 | LBN93 | 5       | 21.06.1993 | E35 46 | N33 31 | 1050 | Biqaa El | Rashaya; 1 km before Kantaba; on the road from Sahmor      |
| <b>40182</b> | ICWB   | 181573  | LBN    | 1121                            | MSJVSK-93070 | LBN93 | 6       | 21.06.1996 | E35 49 | N33 27 | 1020 | Biqaa El | Rashaya; 1 km before Ain Hircha; the road from Rashaya     |
| <b>40183</b> | ICWB   | 181574  | LBN    | 1122                            | MSJVSK-93075 | LBN93 | 7       | 21.06.1993 | E35 45 | N33 26 | 1250 | Biqaa El | Rashaya; 2 km from Ain Ata; on the road to Tefeir          |
| <b>40184</b> | ICWB   | 181575  | LBN    | 1124                            | MSJVSK-93082 | LBN93 | 9       | 22.06.1993 | E36 06 | N33 56 | 1050 | Biqaa El | Ba'labakk; 1 km before Talia; on the road from Zahle       |
| <b>40185</b> | ICWB   | 181576  | LBN    | 1125                            | MSJVSK-93091 | LBN93 | 10      | 22.06.1993 | E36 10 | N34 02 | 1050 | Biqaa El | Ba'labakk; 4 km W Ba'labakk; road to Bcharre; laat village |
| <b>40186</b> | ICWB   | 181577  | LBN    | 1126                            | MSJVSK-93100 | LBN93 | 13      | 22.06.1993 | E36 05 | N34 12 | 1810 | Biqaa El | Ba'lbakk; 3 km from Ain Ata; rad to Bcharre                |
| <b>40187</b> | ICWB   | 181578  | LBN    | 1127                            | MSJVSK-93104 | LBN93 | 14      | 22.06.1993 | E36 02 | N34 08 | 1470 | Biqaa El | Ba'lbakk; 2 km Yamouni coming from Ain Ata                 |
| <b>40188</b> | ICWB   | 181579  | LBN    | 1128                            | MSJVSK-93109 | LBN93 | 16      | 23.06.1993 | E36 05 | N34 01 | 1080 | Biqaa El | 500 m before the end of village Sa'ide; rad to Zahle       |
| <b>40189</b> | ICWB   | 181580  | LBN    | 1129                            | MSJVSK-93112 | LBN93 | 17      | 23.06.1993 | E35 49 | N33 30 | 1100 | Biqaa El | Rashaya; Dahr Al. Ahmar; 2 km NW Rashaya                   |
| <b>40190</b> | ICWB   | 181581  | LBN    | 1130                            | MSJVSK-93120 | LBN93 | 18      | 23.06.1993 | E35 53 | N33 31 | 1200 | Biqaa El | Rashaya; Aiha; 3 km N road to Kfar Qoug                    |

|               |      |        |     |      |              |       |    |            |        |        |      |          |                                             |
|---------------|------|--------|-----|------|--------------|-------|----|------------|--------|--------|------|----------|---------------------------------------------|
| <b>40191</b>  | ICWB | 181582 | LBN | 1131 | MSJVSK-93126 | LBN93 | 19 | 23.06.1993 | E35 54 | N33 34 | 1470 | Biqaa El | Rashaya; 6 km from Kfar Qoug towards Bakaa  |
| <b>40193</b>  | ICWB | 181584 | LBN | 1132 | MSJVSK-93135 | LBN93 | 22 | 23.06.1993 | E35 54 | N33 38 | 1350 | Biqaa El | Rashaya; 1 km E of Aita Al Foukhar          |
| <b>40194</b>  | ICWB | 181585 | LBN | 1133 | MSJVSK-93139 | LBN93 | 23 | 23.06.1993 | E36 01 | N33 48 | 1180 | Biqaa El | Zahle; 2 km N Kosaya road to Deir El Ghazal |
| <b>112846</b> | ICWB | 181657 | LBY | 1134 | Z 16         | LBY82 | 18 | 23.05.1982 | E20 54 | N32 30 | -    | Al Marj  | Al. Marj, occasionally in the city area     |
| <b>112847</b> | ICWB | 181658 | LBY | 1135 | Z 17         | LBY82 | 19 | 24.05.1982 | E24 14 | N31 50 | -    | Tubruq   | Safsaf, Al. Qarah district, roadsides       |

Table S1. Continued

| ICARDA        |      |         |        | OTHERNUMB<br>(IHAR project No.) | COL_NO   | COL CODE | SITE NO | COL_DATE   | LON    | LAT    | ALT  | PROVINCE | SITE                                                                     |
|---------------|------|---------|--------|---------------------------------|----------|----------|---------|------------|--------|--------|------|----------|--------------------------------------------------------------------------|
| IG            | CROP | CROP NO | ORI ID |                                 |          |          |         |            |        |        |      |          |                                                                          |
| <b>110816</b> | ICWB | 181628  | LBN    | 1136                            | 2        | LBN94-1  | 1       | 04.07.1994 | E35 43 | N33 34 | 1010 | Biqaa El | Karaoun, 1 km from the main road to the lake                             |
| <b>110819</b> | ICWB | 181629  | LBN    | 1137                            | 5        | LBN94-1  | 3       | 04.07.1994 | -      | -      | 980  | Biqaa El | Between Kafar Mishki and Jeb Farah; 20 km from site 1                    |
| <b>110823</b> | ICWB | 181630  | LBN    | 1138                            | 9        | LBN94-1  | 5       | 04.07.1994 | E35 53 | N33 31 | 1200 | Biqaa El | 1 km before Kafar Qouk; from Rashaya site road to east (site 18 in 1993) |
| <b>110831</b> | ICWB | 181631  | LBN    | 1139                            | 17       | LBN94-1  | 7       | 05.07.1994 | E35 57 | N33 38 | 1410 | Biqaa El | 2 km before Yanta; road from Aita Al Foukhar                             |
| <b>110833</b> | ICWB | 181632  | LBN    | 1140                            | 19       | LBN94-1  | 8       | 05.07.1994 | E35 51 | N33 35 | 1310 | Biqaa El | 2 km before Ain Arab; the road from Yanta                                |
| <b>116004</b> | ICWB | 181639  | LBY    | 1141                            | IDG 7373 | LBY81    | -       | 08.06.1981 | E21 10 | N32 22 | 450  | Al Marj  | 4 km N main road Taknis-Marawah                                          |
| <b>116005</b> | ICWB | 181640  | LBY    | 1142                            | IDG 7404 | LBY81    | -       | 12.06.1981 | E21 43 | N32 46 | 590  | Al Bayda | Al Bayda, within the city on a road border                               |
| <b>115780</b> | ICWB | 181660  | JOR    | 1143                            | 1        | JOR95    | 1       | 31.05.1995 | E36 01 | N32 01 | 665  | Zarqa    | 700 m before junction Mafraq-Zarqa and Khatlla road                      |
| <b>115781</b> | ICWB | 181661  | JOR    | 1144                            | 10       | JOR95    | 3       | 31.05.1995 | E36 43 | N32 18 | 960  | Mafraq   | Al Mniusa                                                                |
| <b>115782</b> | ICWB | 181662  | JOR    | 1145                            | 14       | JOR95    | 4       | 31.05.1995 | E36 45 | N32 15 | 1000 | Mafraq   | Al Thallag                                                               |
| <b>115784</b> | ICWB | 181664  | JOR    | 1146                            | 19       | JOR95    | 6       | 01.06.1995 | E35 55 | N32 25 | 760  | Irbid    | 3 km W of En Nueima                                                      |
| <b>115785</b> | ICWB | 181665  | JOR    | 1147                            | 21       | JOR95    | 7       | 01.06.1995 | E35 52 | N32 26 | 810  | Irbid    | 1 km after Shatana on road to Irbid                                      |
| <b>115786</b> | ICWB | 181666  | JOR    | 1148                            | 24       | JOR95    | 8       | 01.06.1995 | E35 50 | N32 22 | 1030 | Irbid    | Samta Cross road with Ajlun                                              |
| <b>115787</b> | ICWB | 181667  | JOR    | 1149                            | 26       | JOR95    | 9       | 01.06.1995 | E35 49 | N32 21 | 1020 | Irbid    | Ibben 1 km E                                                             |
| <b>115788</b> | ICWB | 181668  | JOR    | 1150                            | 27       | JOR95    | 10      | 02.06.1995 | E35 52 | N32 41 | 350  | Irbid    | 1 km W Bereshda road to Habras bottom of the wadi                        |
| <b>115789</b> | ICWB | 181669  | JOR    | 1151                            | 28       | JOR95    | 11      | 02.06.1995 | E35 43 | N32 38 | 240  | Irbid    | Monsoura 2 km road to Kafr Asad                                          |

|               |      |        |     |      |    |       |    |            |        |        |      |        |                                                   |
|---------------|------|--------|-----|------|----|-------|----|------------|--------|--------|------|--------|---------------------------------------------------|
| <b>115790</b> | ICWB | 181670 | JOR | 1152 | 29 | JOR95 | 12 | 02.06.1995 | E35 42 | N32 37 | 60   | Irbid  | Bottom of the valley; road Mansoura to Kafr Asad  |
| <b>115791</b> | ICWB | 181671 | JOR | 1153 | 32 | JOR95 | 13 | 02.06.1995 | E35 40 | N32 35 | 30   | Irbid  | The road from Kafr Asad to N Shuneh wadi Al.-Arab |
| <b>115792</b> | ICWB | 181672 | JOR | 1154 | 33 | JOR95 | 14 | 02.06.1995 | E35 40 | N32 21 | 1020 | Irbid  | road Sakhra-Abben; 2 km from Sakhra               |
| <b>115793</b> | ICWB | 181673 | JOR | 1155 | 39 | JOR95 | 17 | 03.06.1995 | E35 41 | N32 02 | 680  | Balqa  |                                                   |
| <b>115795</b> | ICWB | 181674 | JOR | 1156 | 5  | JOR95 | 2  | 31.05.1995 | E36 32 | N32 20 | 830  | Ma'raq | Manchiet Al.-Kabalan                              |
| <b>115796</b> | ICWB | 181675 | JOR | 1157 | 50 | JOR95 | 21 | 05.06.1995 | E35 40 | N30 24 | 1540 | Ma'an  | Al. Hisha 20 km NW Petra                          |
